# Supplementary material for: Antioxidant and Antibacterial Activity of Essential Oils and Hydroethanolic Extracts of Greek Oregano (O. vulgare L. subsp. hirtum (Link) Ietswaart) and Common Oregano (O. vulgare L. subsp. vulgare)
Source: MDPI journal article supplement (doi:10.3390/molecules26040988), 2021-02-13
Supplement: s1 [file s1]

## Supplementary materials concerning compounds identification

### Analysis of essential oils by GC-MS and GC-FID

Separation conditions were as follows: oven temperature isotherm at 60°C for 2 min, then it was programmed from 60°C to 220°C at a rate of 4°C per min and held isothermal at 220°C for 5 min. Essential oil compounds identification was based on comparison of mass spectra from the Mass Spectral Database, as following: NIST08, NIST27, NIST147, NIST11, Wiley7N2, and on comparison of retention indices (RI) relative to retention times of a series of n-hydrocarbons (C7-C30) with those reported in literature [1].

Table S1. The comparison of experimental retention indices with those reported in literature.

| No | Compound                      | RI <sup>1</sup> | RI <sup>2</sup> |
|----|-------------------------------|-----------------|-----------------|
| 1  | $\alpha$ -thujene             | 1024            | 1012–1039       |
| 2  | $\alpha$ -pinene              | 1029            | 1008–1039       |
| 3  | camphene                      | 1074            | 1043–1086       |
| 4  | $\beta$ -pinene               | 1112            | 1085–1130       |
| 5  | sabinene                      | 1126            | 1098–1140       |
| 6  | 3-carene                      | 1147            | 1122–1169       |
| 7  | $\alpha$ -terpinene           | 1185            | 1154–1195       |
| 8  | D-limonene                    | 1204            | 1178–1219       |
| 9  | $\alpha$ -phellandrene        | 1212            | 1148–1186       |
| 10 | 1.8 cyneol                    | 1214            | 1186–1231       |
| 11 | 2-hexenal, (E)                | 1216            | 1196–1238       |
| 12 | <i>trans</i> $\beta$ -ocimene | 1236            | 1211–1251       |
| 13 | $\gamma$ -terpinene           | 1250            | 1222–1266       |
| 14 | <i>p</i> -cymene              | 1275            | 1246–1291       |
| 15 | <i>m</i> -cymene              | 1281            | 1244–1279       |
| 16 | terpinolene                   | 1284            | 1261–1300       |
| 17 | 3-octanol                     | 1391            | 1372–1408       |
| 18 | 1-octen-3-ol                  | 1446            | 1411–1465       |
| 19 | linalool                      | 1542            | 1507–1564       |
| 20 | $\beta$ -caryophyllene        | 1594            | 1570–1685       |
| 21 | terpinen-4-ol                 | 1597            | 1564–1630       |
| 22 | <i>cis</i> -terpineol         | 1621            | 1616–1644       |
| 23 | <i>trans</i> -terpineol       | 1674            | 1659–1724       |
| 24 | $\alpha$ -humulene            | 1658            | 1637–1689       |
| 25 | borneol                       | 1684            | 1653–1728       |
| 26 | $\beta$ -bisabolene           | 1741            | 1698–1748       |
| 27 | $\alpha$ -farnesene           | 1749            | 1714–1763       |
| 28 | $\alpha$ -ionone              | 1846            | 1798–1892       |
| 29 | caryophyllene oxide           | 1976            | 1936–2023       |
| 30 | (-)-spathulenol               | 2125            | 2074–2150       |
| 31 | thymol                        | 2166            | 2100–2205       |
| 32 | carvacrol                     | 2213            | 2140–2246       |
| 33 | $\alpha$ -cadinol             | 2229            | 2180–2255       |

<sup>1</sup> RI—experimental retention index on polar Omegawax® column

<sup>2</sup> RI—range of retention indices on polar column reported by Babushok et al. (2011) [1].

## Analysis of phenolic acids and flavonoids by HPLC

### *Validation*

The standards were purchased from Sigma Life Science (Merck, Darmstadt, Germany) and ChromaDex® (Irvine, USA) and separately dissolved with MeOH in 25 ml volumetric flask according to the ChromaDex's Tech Tip 0003: Reference Standard Recovery and Dilution and used as standard stock solutions [2]. Working solutions were prepared by diluting 10 µl and 100 µl of standard stock solutions with methanol in 10 ml volumetric flasks, 500 µl and 1000 µl in 5 ml volumetric flasks as well as 1000 µl in 2 ml volumetric flasks. The working solutions and undiluted stock solutions were injected (1 µl) on a column in six replicates (n=6) using SIL-20AC HT. Six-point calibration curves were plotted according to the external standard method by correlating concentration with peak area. Curves parameters were calculated with Microsoft Excel 14. Signal-to-noise ratio approach were used to determined LOD (S/N of 3:1) and LOQ (S/N of 10:1). The peak table and UV-spectra library (190-450 nm) of individual compounds were also created.

### *Parameters of separations*

The work were performed using a Shimadzu Prominence chromatograph equipped with auto sampler SIL-20AC HT, photodiode array detector SPD-M20A and LCsolution 1.21 SP1 chromatography software (Shimadzu, Kyoto, Japan). Separations were achieved using a 100 mm × 4.60 mm, C18 reversed-phase column, 2.6 µm particles with solid core and porous outer layer (Kinetex™, Phenomenex, USA). Binary gradient of mobile phase A (deionised water adjusted to pH 2 with phosphoric acid) and B (ACN) was used as follows: 0 min – 12.5% B; 4.0 min – 23% B; 6.0 min – 50% B; 6.01 min – 12.5% B; 8 min – stop. The HPLC conditions were as follows: flow rate 1.5 ml×min<sup>-1</sup>, oven temperature 40 °C, injection volume 1 µl.

### *Parameters of integration*

Peak identification was carried out by comparison of retention time as well UV-spectra with standards (Table S2).

Table S2. Retention times and UV-spectra of standards.

| Compound               | Rt (min) | λ (nm) |
|------------------------|----------|--------|
| Protocatechuic acid    | 1.42     | 254    |
| Caffeic acid           | 2.10     | 325    |
| Chlorogenic acid       | 1.75     | 325    |
| Rosmarinic cid         | 5.20     | 325    |
| Lithospermic acid B    | 5.34     | 254    |
| Luteolin 7-O-glucoside | 4.10     | 335    |
| Apigenin 7-O-glucoside | 4.85     | 335    |
| Naryngenin             | 6.95     | 284    |
| Isovitexin             | 2.15     | 335    |
| (+)-Catechin           | 1.61     | 203    |
| (-)-Epicatechin        | 2.25     | 203    |

References:

1. Babushok, V.I.; Linstrom, P.J.; Zenkevich, I.G. Retention Indices for Frequently Reported Compounds of Plant Essential Oils. *J. Phys. Chem. Ref. Data* **2011**, *40*.
2. [https://www.chromadex.com/media/2126/techtip0003recoverydilutionprocedures\\_nl\\_pw.pdf](https://www.chromadex.com/media/2126/techtip0003recoverydilutionprocedures_nl_pw.pdf)
